# Supplementary material for: Evidence for densovirus integrations into tapeworm genomes
Source: PubMed Central journal article supplement (PMC6880638; doi:10.1186/s13071-019-3820-1), 2019-11-27
Supplement: 13071_2019_3820_MOESM2_ESM.pdf [file 13071_2019_3820_MOESM2_ESM.pdf]

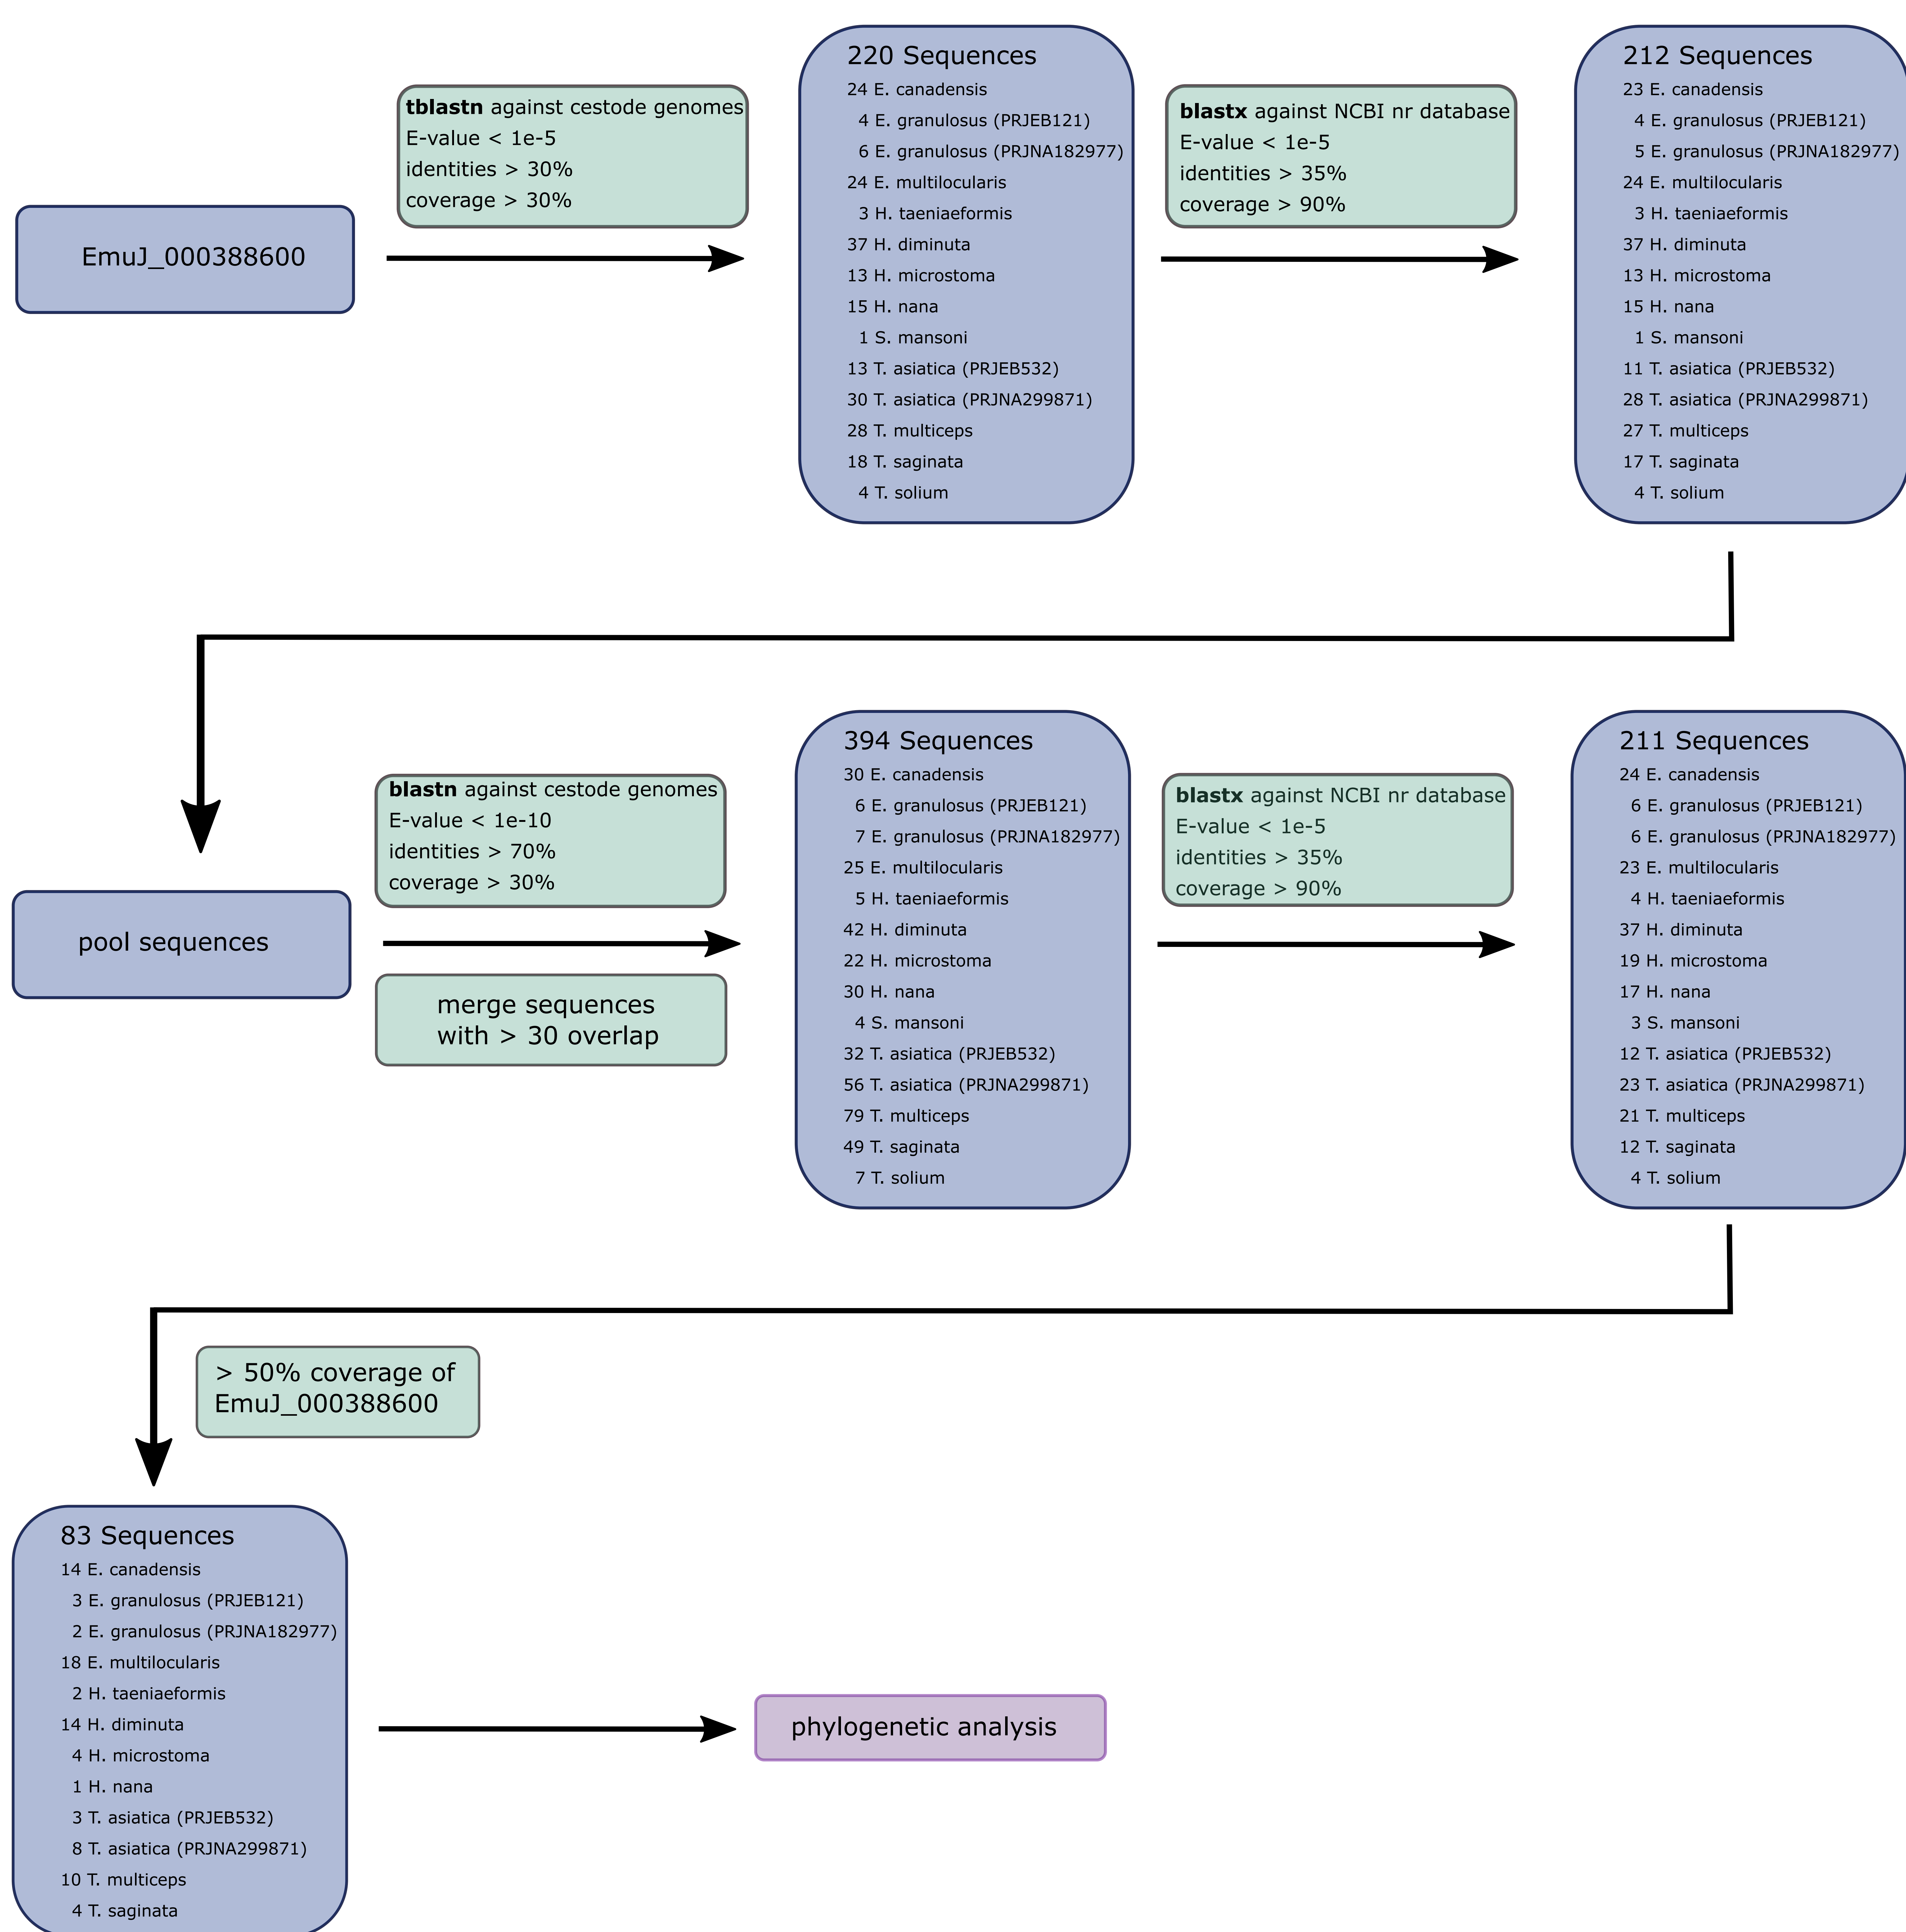

**Additional file 2: Figure S1. Schematic overview of the bioinformatic workflow**
