# Supplementary material for: Evidence for densovirus integrations into tapeworm genomes
Source: PubMed Central journal article supplement (PMC6880638; doi:10.1186/s13071-019-3820-1), 2019-11-27
Supplement: 13071_2019_3820_MOESM3_ESM.pdf [file 13071_2019_3820_MOESM3_ESM.pdf]

```

EmuJ_000388600.1 -----MHVIFQSSPNNVSRKMERITIE----- 22
P27454.1 MEYGLISKFYMDHWRWKIREKHKVENLLSTYKYLNFHYHMHVPHYLRSTKGGPNRVMNSVCVEHS PCEHGNLFCECIYCWEHGDQCRGRK--LDLGAST 98
Q90185.1 -----STEYIRGINEGRVSSMESVCSVEHS PCEHGNIECECICFWEHDAQCKSRRELDDLGEPT 58

EmuJ_000388600.1 -----CGVPLQAVPDI-----KMTKQLVRNVLTALIRYMRGRGEVVA-----TDDHFD 64
P27454.1 GIERRLANDNQPLGSLDYCTETIHLATAIPERRITDRENYVKDFAGCTVGDLYPOLQGSTGASEPIDFAFPTVVGSGWEILVRESHKHFENYTEAYQ 198
Q90185.1 GSERGMANNYEQSRNEDLYCTETVPSAAL-QANTITERDIREDFTDCTVDNIYPQLHSGSRASEQLFAFPTIGTRSWEILIRQSYEHLKPDYKEEDFQ 157

EmuJ_000388600.1 HFLQ-----VATVLSLEWPNCSVIPSEN-----RMNKSACEEDKREVKR 103
P27454.1 SHIRSVRRRLFPEETMDNNGSQASTTEMLRDAVQRCGFEGPPNSPSENNRDIDGTICISTVDIQ-SNCIVNAHCPKQGTSTNQTNKRKSTDTTSESSESKK 297
Q90185.1 SHIRSVRRQLFPEKTMNNGSQASTTQMLRDDIERCGIESIADSAEDNGDVGDTICISTVDIQ-GNCIVNAHNEQATGSKT-RKIRATTPSESSESKK 255

EmuJ_000388600.1 QRY-----IDLAEETMRRKVRSMNDMKNKFTY-----QETFRILMA----- 138
P27454.1 NKSNNYQNLQEQGSTS-ISDTIDIVDGLDGTSGSNRETAYTFVFLHKNNVKEDWRYIATTRAKQAPSFTTFDGHGDIHILFSSSNTGGNSTRVTRIT 396
Q90185.1 HGSNNQNIQEQSSTTALADGHDIVDGLDGRSESNRETAYTFVFLHKNCKEDWRYIATTRAKQAPSFTTFDGHGDIHILFSSSNTGGNSTRVTRIT 355

EmuJ_000388600.1 -----DYEQSNM-IVRKALETVRTM-NVAHQRAVDYMDLLKEELDN-----VRNGCPSHL---CAYPKNHSGPSRKS----- 202
P27454.1 KFLSATSAGSAEATITFSKVKFLRNMILYCYTRYGIEFVNIYGNKIQQLTEAMDTFKLVLFENRDPNDVILEAGCKLYHEEKDNKQKRCGQRKQNLTDI 496
Q90185.1 KFLSATSAGNAEATITFSKVKFLRNMILYCYTRYGIEFVNIYGNKIQQLTEAMDTFKLVLFENRDPNDVILDAGCKLYHEEKKEYQKRCGQRKQNLTDI 455

EmuJ_000388600.1 -----TQWLEDMESANE----- 214
P27454.1 ILEKIKEKKITTAQQWENQIEPEFKIQLMKEFGLNVDYSYVTRIVRIERTRIQQLIKAKTLTEIMLEILNDEYIKHFPTGEDNSKTAKCHEWTEYLFKKN 596
Q90185.1 ILDKIKEKKITTAQQWENIEPEFKIQLMKEFGLNVDYSYQRIVRIERTRIQQI IKS KTLTEIMVEILNEEYIKNFTPGEDNSKLNITQWLEYMFKKN 555

EmuJ_000388600.1 IAVVDFAITLRLIMNCEDEKINTLVLYGPTNTGKSLICRLTTTFLEHGSVMRROEASAFAYENLLNRKVALMEEPRIICANQODLQQLGGEPPFEVHIKY 314
P27454.1 INI IHLAWNELIKTKRYKINGMVLGEGITNAGKSLILDNLLAMVKPEEIPRERDNSGFHLDQVPGAGSILFEEPMITPVNVGTWKLLEKTIKTDVKN 696
Q90185.1 INI IHLAWNELIKPKRYKINGMVLGEGITNAGKSLILDNLLAMVKPEEIPRERDNSGFHLDQVPGAGSVLFEPMITPVNVGTWKLLEKTIKTDVKN 655

EmuJ_000388600.1 QNPDLERLPLVIVITNEPLGVRLSDVDAAAEGRCKLYTLDKQI-----CNANIDGSVPA-PPYKLCACDMAHLLLP---IYELLAL----- 392
P27454.1 KDKEPIERTPTWITTAETPTNNIDMNETSOLLQRIKLYILKRSIQHRDDKYTINAQIQNKLSRPPLEPIHMAIVFVKNFYKLYNLAEDKAHTVNE 796
Q90185.1 KDKEPIERTPTWITTAETPTNNVHMNETSOLLQRIKLYIFKRSIQHREDKYTINAQIQNKLSRPPGLVEPIHMAIVFVKNFKEIYKLYIEEDNAHTVNE 755

EmuJ_000388600.1 ----- 392
P27454.1 KAIQINNEVKEEAEWQTALQWMTTENNEEQENETQALEDQVLELAKEQATT 849
Q90185.1 KAIRLSEEAQEAEEWQTALQWNTMEEEQKENEKQT---EDQKESSEKETATQ 805

```

**Additional file 3: Figure S2. Alignment of dengovirus NS1 sequences.** Identical amino acids are shown white on black background, biochemically similar amino acids are shown on grey background. The black line indicates the position of the Parvo\_NS1 domain (PF01057.17) in EmuJ\_000388600. EmuJ\_000388600: *E. multilocularis* dengovirus NS1; P27454.1: *Aedes denonucleosis virus* NS1; Q90185.1: *Aedes albopictus parvovirus* NS1.
