# Supplementary material for: Evidence for densovirus integrations into tapeworm genomes
Source: PubMed Central journal article supplement (PMC6880638; doi:10.1186/s13071-019-3820-1), 2019-11-27
Supplement: 13071_2019_3820_MOESM4_ESM.pdf [file 13071_2019_3820_MOESM4_ESM.pdf]

contig 0226

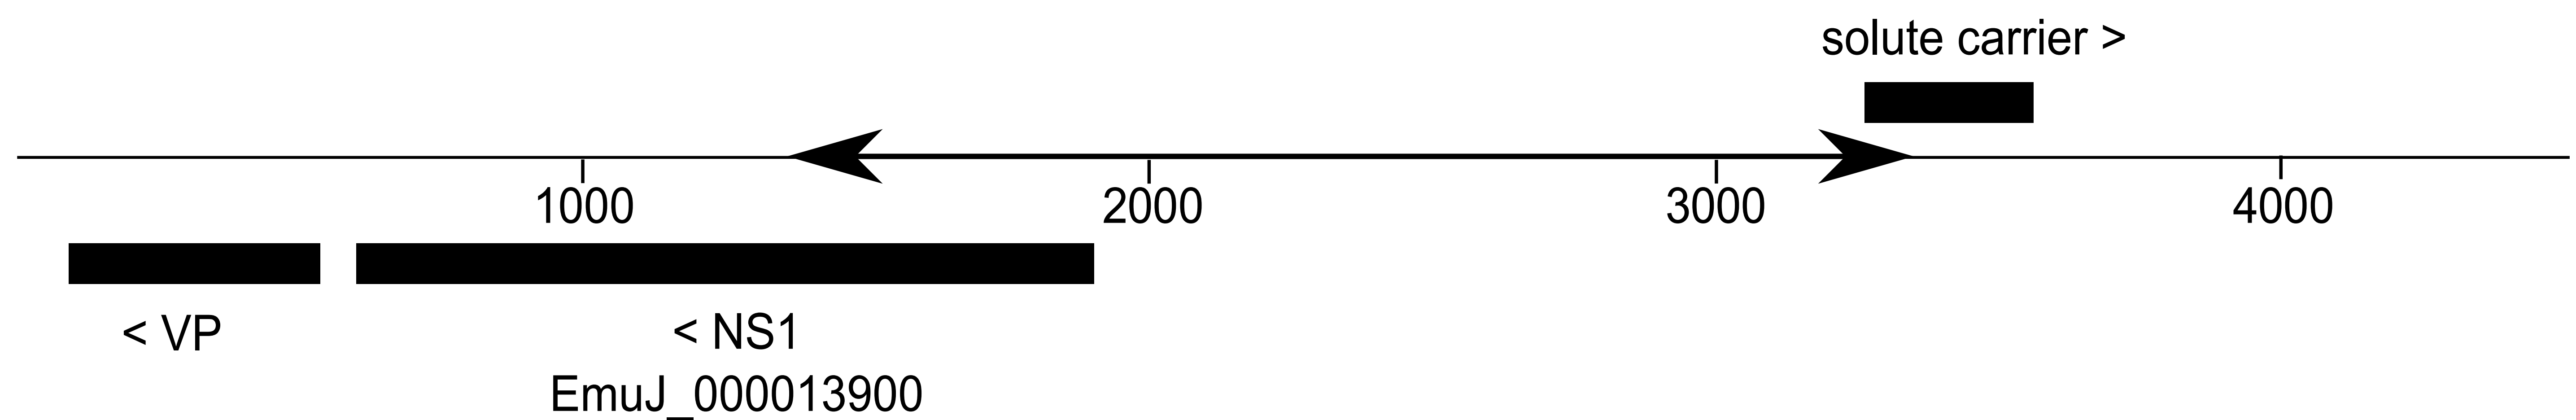

contig 0303

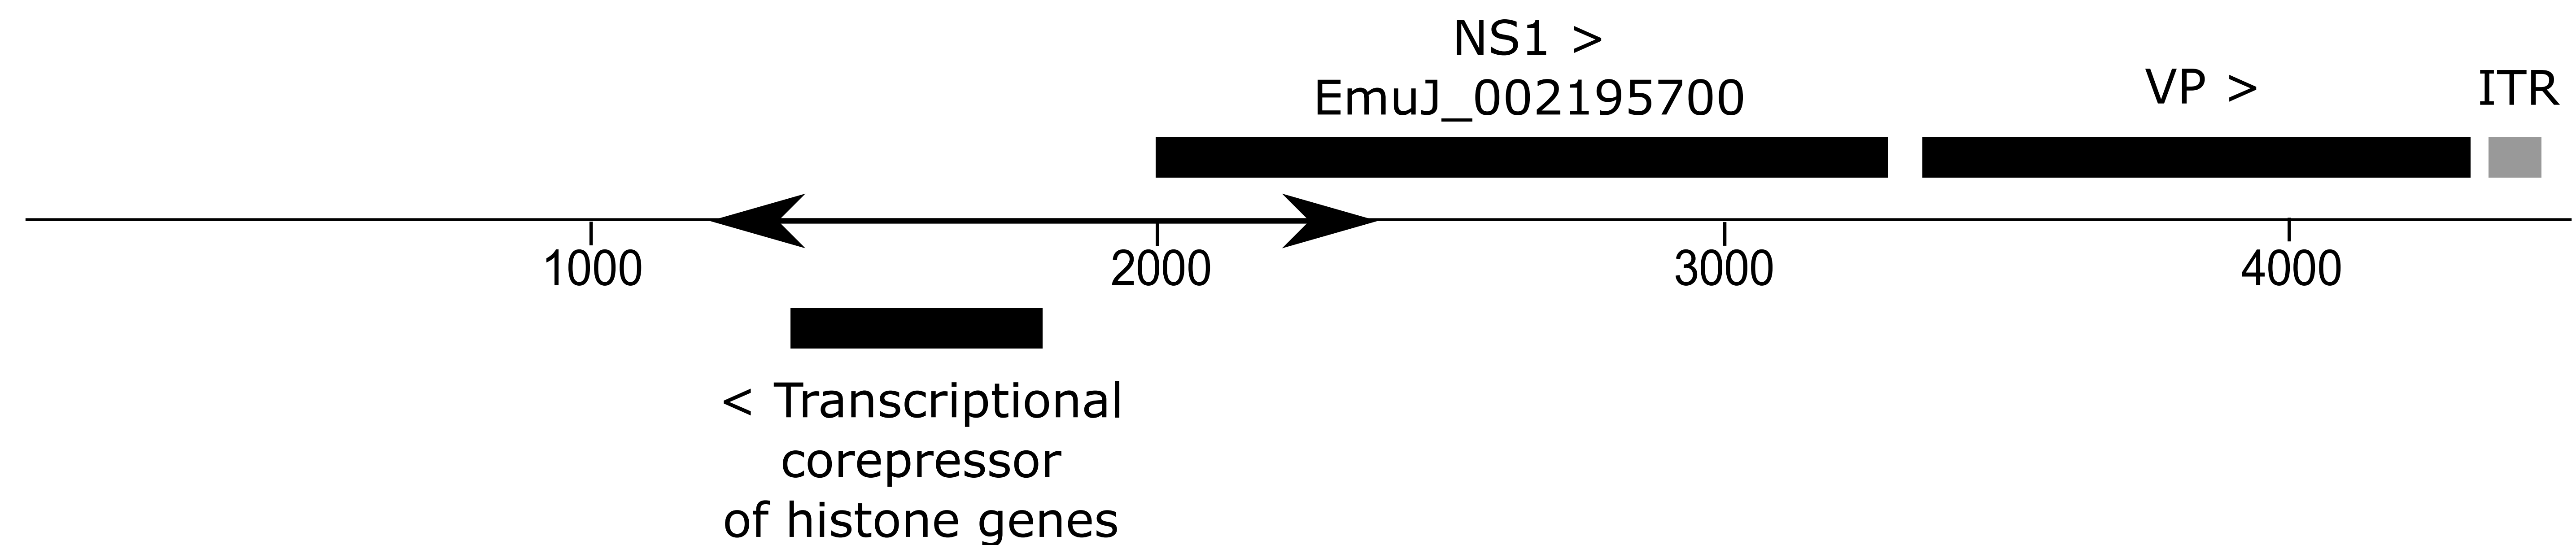

scaffold 9

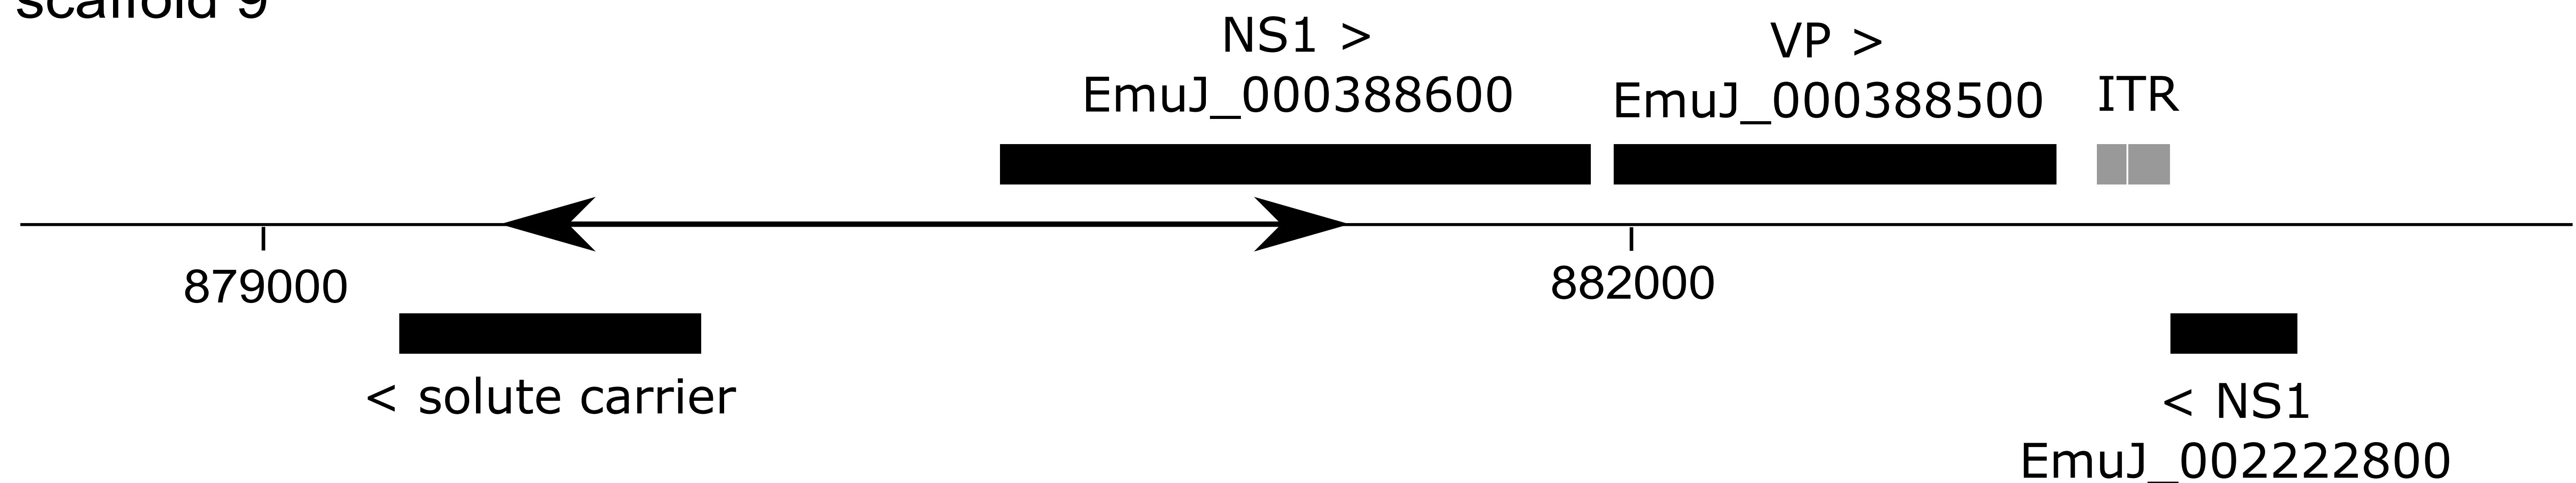

scaffold 11

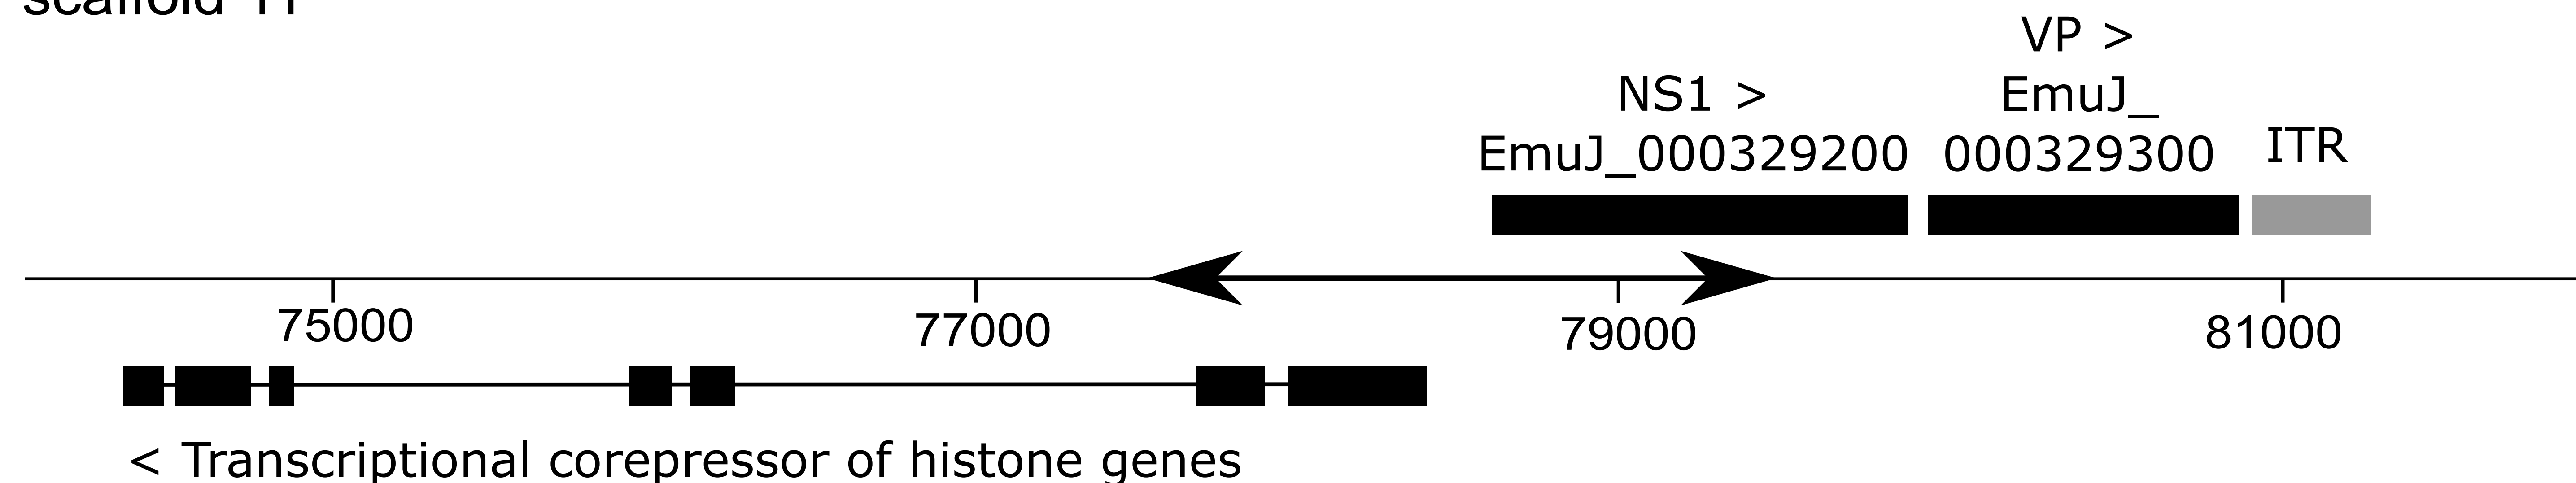

**Additional file 4: Figure S3. Dengovirus integration sites in the *E. multilocularis* genome.** Shown is a schematic representation of the complete contigs 0226 and 0303 and parts of scaffold 9 and 11. Exons and ITRs are represented by black and grey boxes, introns by lines. Arrowheads indicate gene orientation. Double headed arrows show sequenced genome regions. NS1: non-capsid protein 1; VP: capsid protein; ITR: inverted terminal repeat.
